# Supplementary material
Source: publisher site journal article supplement (https://www.dovepress.com/article/461959)
Supplement: Supplementary file 1 [file get_supplementary_file.php]

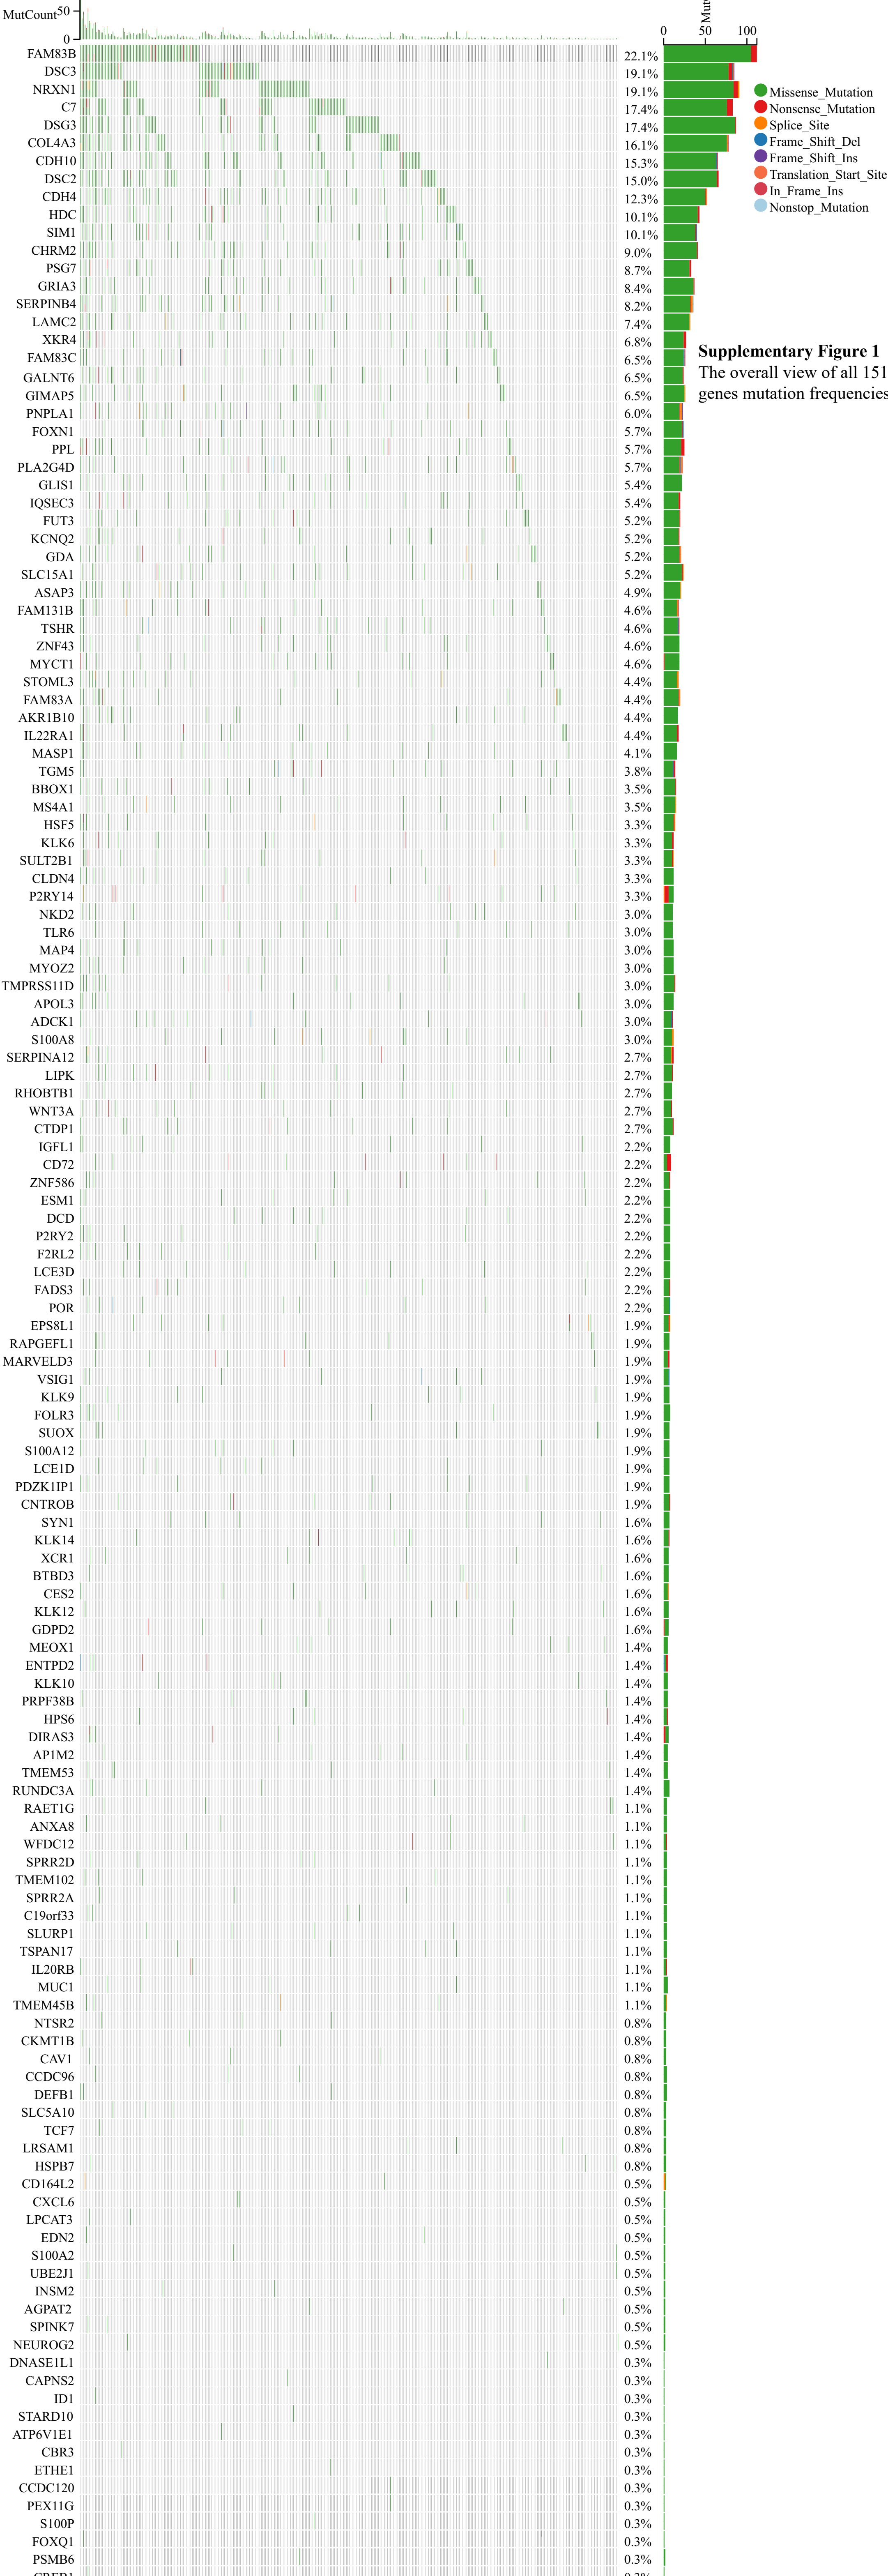

# Supplementary Figure 2

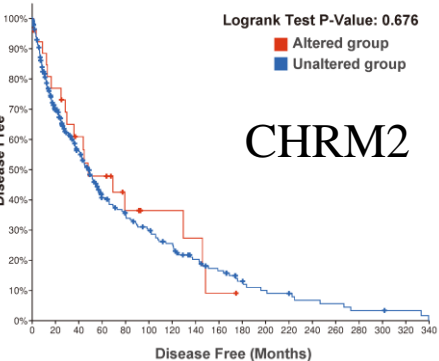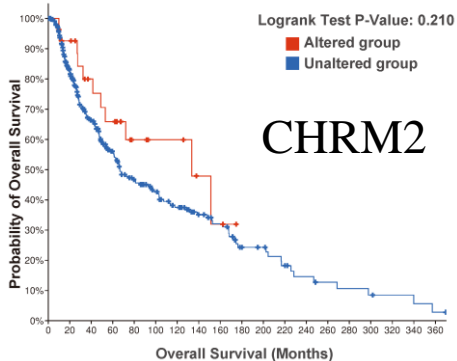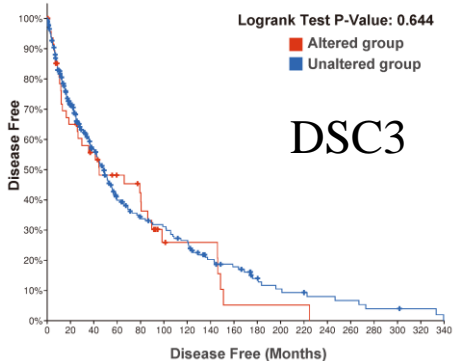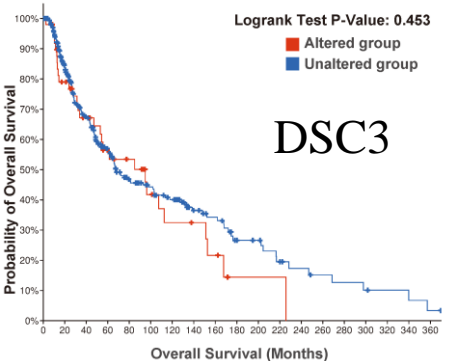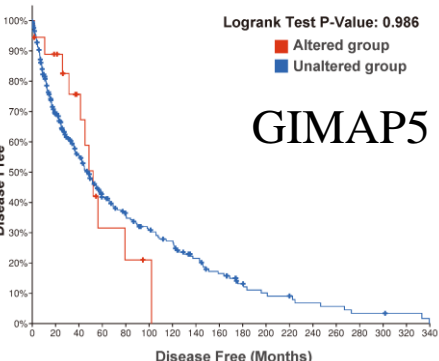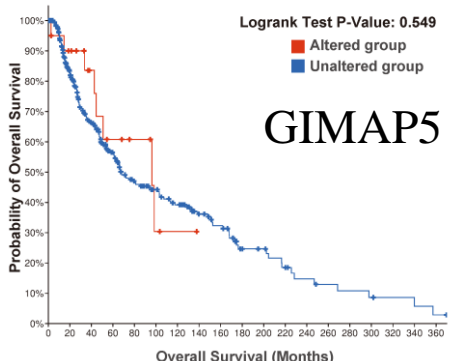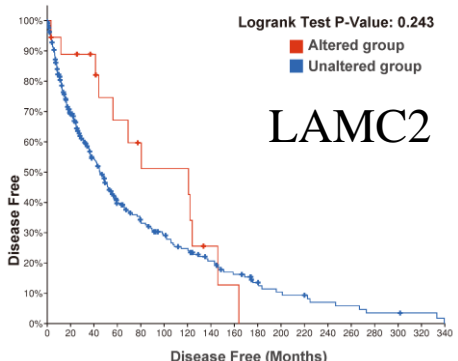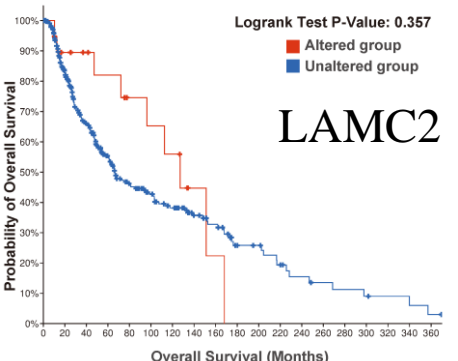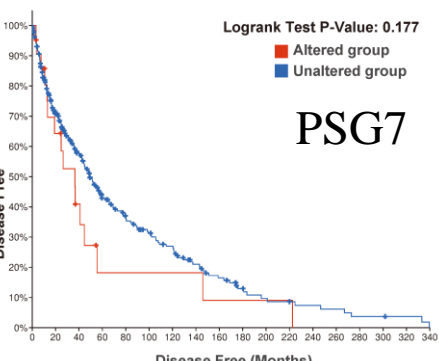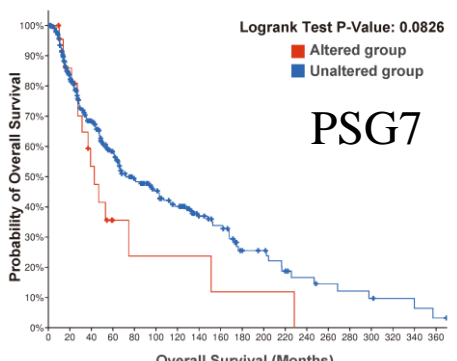

**Supplementary Figure 2** The prognostic analysis of CHRM2, DSC3, GIMAP5, LAMC2 and PSG7 mutation in SKCM patients.

Effect of COL4A3 expression level on SKCM patient survival

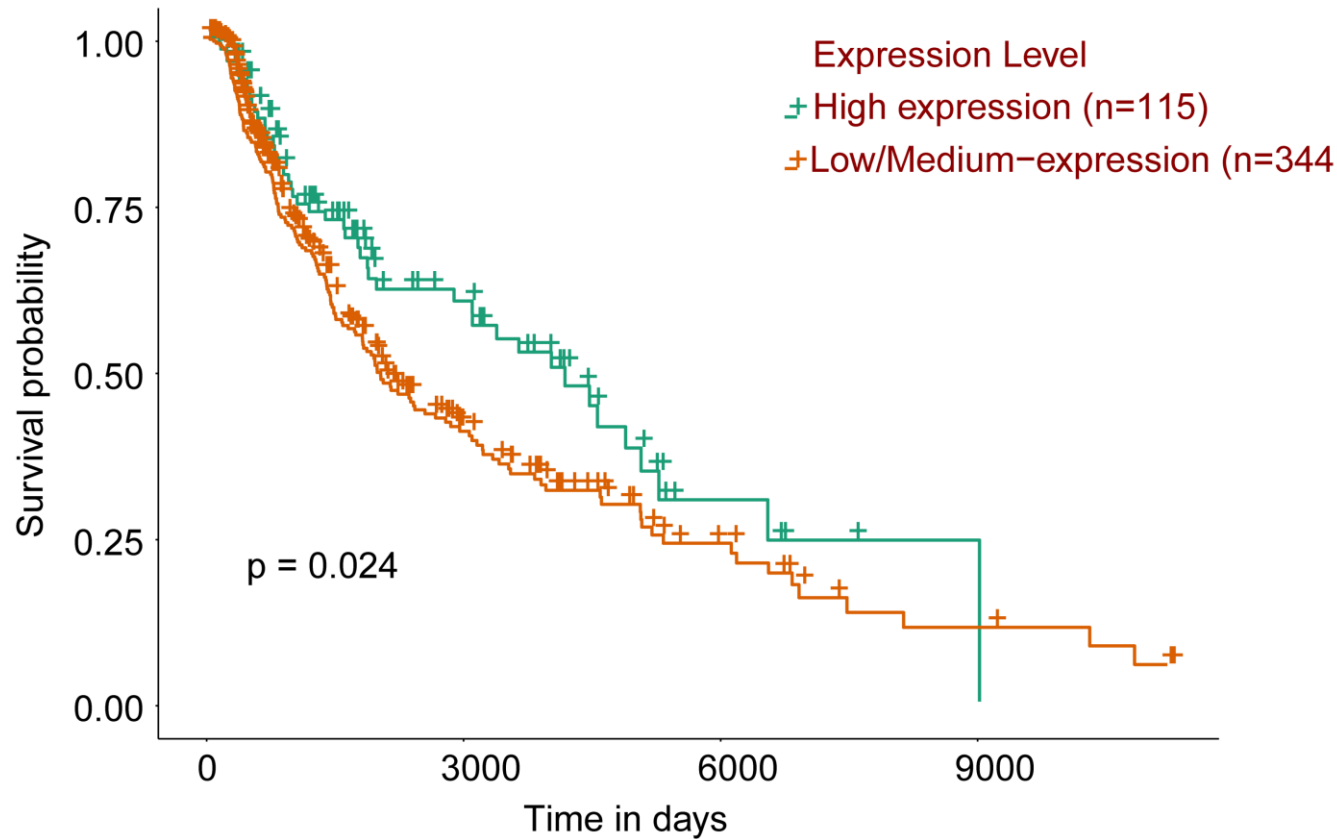

Overall Survival

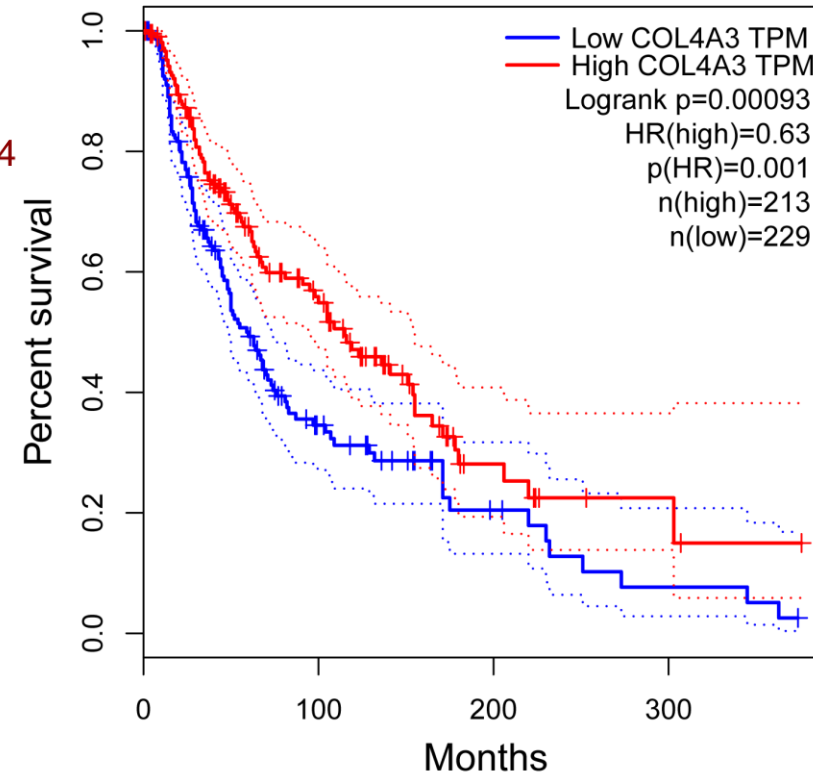

Supplementary Figure 3 Kaplan-Meier graphs exhibiting OS outcomes for low and high COL4A3 groups.

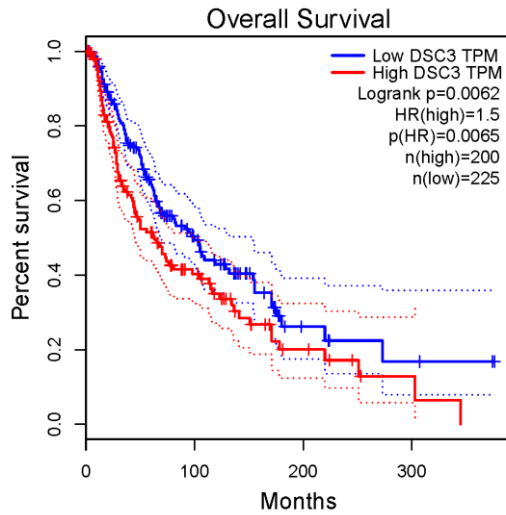

DSC3

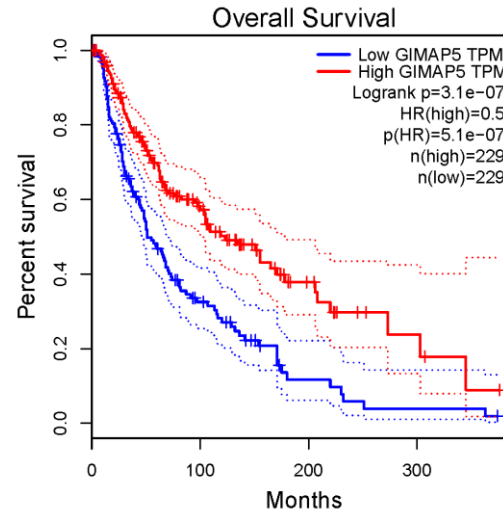

GIMAP5

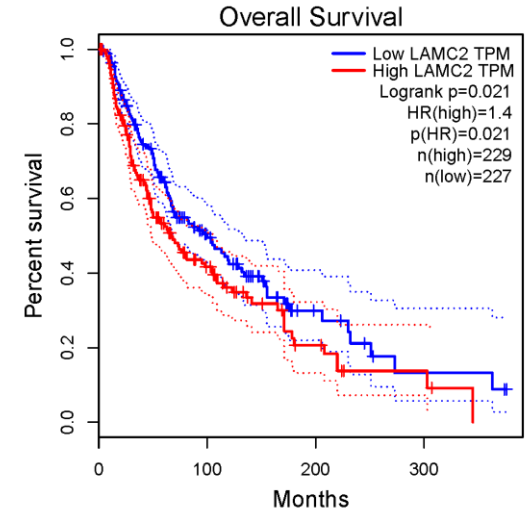

LAMC2

**Supplementary Figure 4** Kaplan-Meier graphs exhibiting OS outcomes for low and high groups of DSC3, GIMAP5, LAMC2.
